1 Running Head: Interactions of soil fauna and drought on plant invasion

2

3 **Soil fauna may buffer the negative effects of drought on alien plant invasion**

4

5 Huifei Jin<sup>1, 2†</sup>, Liang Chang<sup>1†</sup>, Mark van Kleunen<sup>3,4</sup>, Yanjie Liu<sup>1,3\*</sup>

6

7 <sup>1</sup>*Key Laboratory of Wetland Ecology and Environment, Northeast Institute of Geography and*  
8 *Agroecology, Chinese Academy Sciences, Changchun 130102, China*

9 <sup>2</sup>*University of Chinese Academy of Sciences, Beijing 100049, China*

10 <sup>3</sup>*Ecology, Department of Biology, University of Konstanz, 78464 Konstanz, Germany*

11 <sup>4</sup>*Zhejiang Provincial Key Laboratory of Plant Evolutionary Ecology and Conservation, Taizhou*  
12 *University, Taizhou 318000, China*

13

14 †Huifei Jin and Liang Chang contributed equally to the work.

15

16 \*Email of corresponding author: liuyanjie@iga.ac.cn +86 431 82536096

17

18

19 **Abstract**

20       Assessing how climate change affects the potential invasion risk of alien plants has garnered  
21 considerable interest in ecology. Although many studies have tested the direct effects of drought  
22 on alien plant invasion, less is known about how drought affects alien plant invasion indirectly  
23 via other groups of organisms such as soil fauna. To test for such indirect effects, we grew single  
24 plant of nine naturalized alien target species in pot mesocosms with a native community of five  
25 native grassland species under four combinations of two drought (well-watered vs drought) and  
26 two soil-fauna (with vs without) treatments. We found that drought decreased the absolute and  
27 the relative biomass production of the alien target plants, and thus reduced their invasion success  
28 in the native community. Inoculation with a soil fauna increased the biomass of the native plant  
29 community and thereby decreased the relative biomass production of the alien species. The  
30 increased invasion resistance due to soil fauna tended ( $p = 0.09$ ) to be stronger for plants  
31 growing under well-watered conditions than under drought. Our multispecies experiment shows  
32 for the first time that soil fauna might help native resident communities to resist alien plant  
33 invasions, but that this effect might be diminished by drought.

34       **Key words:** alien-native competition, biological invasion, climate change, exotic,  
35 plant-environment interactions, soil animals

## 36 INTRODUCTION

37 With the rapid globalization, more and more plant species have been introduced to new  
38 regions outside their native range (van Kleunen et al. 2015; Seebens et al. 2018; van Kleunen et  
39 al. 2018). Some of these alien plants have become invasive, which could decrease native species  
40 diversity, change nutrient cycles, and thereby affect ecosystem functions (Hejda et al. 2009; Vilà  
41 et al. 2011; Pyšek et al. 2012; Linders et al. 2019; Pyšek et al. 2020). Forecasts show that the  
42 number of alien plant species per continent may increase on average by 18% from 2005 to 2050  
43 (Seebens et al. 2020), indicating that the impacts of plant invasions on ecosystems may become  
44 even more serious. However, as there are many potential drivers of invasions, there are many  
45 uncertainties about how invasions and their impacts will develop in the future (Essl et al. 2020).  
46 In this regard, particularly the potential effects of ongoing climate change on plant invasions  
47 have garnered interest (Liu et al. 2017; Bartz and Kowarik 2019).

48 In many places, climate change is characterized by more frequent and more intense drought  
49 events (Dai 2013; Diffenbaugh et al. 2015; Yoon et al. 2015; Spinoni et al. 2018). Droughts do  
50 not only reduce water availability to the plants, but also decreases the nutrient absorption (da  
51 Silva et al. 2011; Bueno et al. 2020). Consequently, drought might affect the competition  
52 between alien and native plants (Werner et al. 2010; Manea et al. 2016; Bueno et al. 2020), and  
53 thereby affect invasion success of alien plants (Ahanger et al. 2016; Mohammad et al. 2016;  
54 Haeuser et al. 2019; Bueno et al. 2020). For example, Manea et al. (2016) found that drought  
55 could reduce biomass production of native grasses, and consequently enhance the establishment  
56 success of alien plants. However, many other studies also found that invasive plants may suffer  
57 more from drought than native species, indicating that drought could also suppress alien plant  
58 invasion (Werner et al. 2010; Copeland et al. 2016; Liu et al. 2017; LaForgia et al. 2018; Valliere

59 et al. 2019; Kelso et al. 2020). One of the reasons for the mixed findings could be that most  
60 studies only considered direct effects of drought on alien plant invasion (Copeland et al. 2016;  
61 Liu et al. 2017; Pintó-Marijuan et al. 2017; Valliere et al. 2019). Much less is known about the  
62 indirect effects, i.e. how drought affects alien plant invasion via other trophic levels.

63 Soil fauna include several important belowground trophic levels, which are increasingly  
64 recognized to affect plant competition (Wardle et al. 2004; Bardgett et al. 2005; Eisenhauer and  
65 Scheu 2008; Eisenhauer et al. 2010). On the one hand, soil fauna could enhance nutrient  
66 mineralization, and thereby increase plant nutrient uptake (Smith and Steenkamp 1992;  
67 Marinissen and de Ruiter 1993; Bardgett and Chan 1999; Xu et al. 2003; Cole et al. 2004; Barot  
68 et al. 2007; Eisenhauer et al. 2010). Given that invasive plants frequently respond more  
69 positively to nutrient enrichment than native plants (Liu et al. 2017; Liu et al. 2018), the higher  
70 nutrient availability caused by soil fauna may increase the invasion success. On the other hand,  
71 soil fauna can also change alien-native competition via herbivory effects (Bonkowski et al. 2009;  
72 Korell et al. 2019). The enemy-release hypothesis poses that alien plants are released from most  
73 of their native enemies (Keane and Crawley 2002, Mitchell and Power 2003, Vilà et al. 2005,  
74 Liu and Stiling 2006). Following this logic, alien plants would be damaged less than natives by  
75 herbivorous soil fauna, and therefore soil fauna would promote alien plant invasion. However,  
76 until now very few studies have tested how soil fauna affects alien plant invasion into resident  
77 communities (Bonkowski et al. 2009; Korell et al. 2019).

78 It has often been found that indirect effects of altered biotic interactions due to climate  
79 change on species populations are more pronounced than their direct effects (Ockendon et al.  
80 2014). For example, empirical studies indicated that belowground trophic interactions could alter  
81 the plant responses to drought (Erb et al. 2011; Guyer et al. 2018; Franco et al. 2020; Wilschut

82 and van Kleunen 2021). Consequently, it is likely that drought might indirectly affect alien plant  
83 invasion in resident communities via effects on soil fauna. Indeed, drought can reduce the  
84 abundance and diversity of soil fauna (Makkonen et al. 2011; Eisenhauer et al. 2012; Guyer et al.  
85 2018; Aupic-Samain et al. 2020; Wilschut and Geissen 2020). Given that soil fauna, in particular  
86 some of the root herbivores might affect competition between native and alien plants, indirect  
87 effects of drought on alien plant invasion in resident community would occur via the cascading  
88 effect of drought suppression on soil fauna (Bonkowski et al. 2009; Korell et al. 2019). However,  
89 it has not been tested yet how drought could indirectly, via effects on soil fauna, affect plant  
90 invasion.

91 To test the direct and indirect effects (i.e. via soil fauna) of drought on alien plant invasion  
92 into a native resident community, we performed a mesocosm-pot experiment. We grew single  
93 plants of nine alien target species in a community of five native grassland species under four  
94 combinations of two drought (well-watered *vs* drought) and two soil-fauna (with *vs* without)  
95 treatments. By comparing the absolute aboveground biomass production of the alien target  
96 species as well as their biomass production relative to the biomass production of the native  
97 competitors, we addressed the following specific questions: (1) Does drought suppress the  
98 absolute and relative biomass of alien species? (2) Does the presence of soil fauna promote or  
99 suppress the absolute and relative biomass of alien species? (3) Does the presence of soil fauna  
100 change the effect of drought on the absolute and relative biomass of alien species?

## 101 MATERIAL AND METHODS

### 102 *Study species*

103 To test the effects of drought, the presence of soil fauna, and their interaction on alien plant  
104 invasion in a native grassland community, we chose nine naturalized alien species as targets and  
105 five native species as competitors from the herbaceous flora of China (see Supporting  
106 Information Table S1). We classified the species as naturalized alien or native to China based on  
107 information in the book “The Checklist of The Naturalized Plants in China” (Yan et al. 2019) and  
108 the Flora of China database ([www.efloras.org](http://www.efloras.org)). To cover a wide taxonomic breadth, the nine  
109 alien species were chosen from eight genera of four families. The five native species, used to  
110 create the native community, included two forbs and three grasses that are all very common and  
111 do co-occur in grasslands in China. Seeds of all species, except one whose seeds were bought  
112 from a commercial seed company, were collected from natural populations growing in grasslands  
113 (Table S1).

### 114 *Soil-fauna collection*

115 To provide a live soil-fauna community as inoculum for the pot mesocosms, we collected  
116 soil fauna from a grassland site at the Northeast Institute of Geography and Agricultural Ecology,  
117 Chinese Academy of Sciences (125°24'30"E, 43°59'49"N) on 21 July 2020. In the grassland, we  
118 removed aboveground plant materials from each of 100 sampling locations (30cm × 30cm), and  
119 then collected from each location a soil sample of 1-L (10cm × 10cm × 10cm) using a shovel.  
120 Each sampling location was at least 10m apart from the others. Then, we brought the 100 soil  
121 samples back to the laboratory, where we extracted the soil fauna communities of each soil  
122 sample separately using the Macfadyen method (Macfadyen 1962). In brief, we put all soil  
123 samples on top of 100 stainless steel soil-sieves with a 2mm mesh size, and then waited 12 days

124 so that many of the soil organisms would fall through the holes, via stainless steel funnels, into  
125 plastic bottles filled with 50 ml potting soil (Pindstrup Plus, PindstrupMosebrug A/S,  
126 103Denmark; pH 6; 120 mg/L N; 12 mg/L P; 400 mg/L K; 28 mg/L Mg; 0.4 mg/L B; 2.0 mg/L  
127 Mo; 1041.7 mg/L Cu; 2.9 mg/L Mn; 0.9 mg/L Zn; 8.4 mg/L Fe). On 2 August 2020, we finished  
128 the soil-fauna-community collection. We then randomly chose ten of the 100 soil-fauna  
129 communities for soil-fauna investigation (see Supporting Information Table S2), and used the  
130 remaining 90 soil-fauna communities for inoculating of the soil in the experimental pot  
131 mesocosms.

### 132 *Experimental set-up*

133 To compare the growth performance of alien plants when growing in a resident native  
134 grassland community under different drought and soil-fauna treatments, we did a mesocosm-pot  
135 experiment in a greenhouse of the Northeast Institute of Geography and Agricultural Ecology,  
136 Chinese Academy of Sciences. We grew each of the nine alien species in the centre of a matrix of  
137 the native community under two water availabilities (well-watered vs drought) and two soil  
138 fauna treatments (with vs without).

139 From 15 May to 5 July 2020, we sowed the seeds of each species separately into plastic  
140 trays (195 × 146 × 65 mm) filled with the same potting soil as used for soil-fauna collection. As  
141 previous experiments had shown that the time required for germination differs among the species,  
142 we sowed the species on different dates (Table S1) to get similarly sized seedlings at the start of  
143 the experiment. On 3 August 2020, we filled 180 2.5-L circular plastic pots (top diameter ×  
144 bottom diameter × height: 18.5 × 12.5 × 15 cm, Yancheng Tenge Plastics Co., Ltd, China) with  
145 the same potting soil as used for germination. To avoid nutrient limitation during plant growth,  
146 we mixed each pot with 5 g slow-release fertilizer (Osmocote® Exact Standard; 15% N + 9.0%

147  $P_2O_5 + 12\% K_2O + 2.0\% MgO + 0.02\% B + 0.05\% Cu + 0.45\% Fe + 0.09\%$  chelated by EDTA +  
148  $0.06\% Mn + 0.02\% Mo + 0.015\% Zn$ , Everris International B.V., Geldermalsen, The  
149 Netherlands). To create the native community, we selected similarly sized seedlings from each of  
150 the five native species, and transplanted one seedling of each native species at equal distance in a  
151 circle (diameter = 11 cm) around the centre of each pot. We then planted into the centre of each  
152 pot one seedling of one of the alien species. For each of the nine alien species, we had 20 pots.

153 After transplanting, we randomly assigned 2 pots of each alien species to each of ten plastic  
154 cages (150 cm × 90 cm × 100 cm). The ten cages were covered with nylon nets (mesh size: 0.15  
155 × 0.15 mm) to keep out small soil fauna. We put a plastic dish under each pot, and regularly  
156 watered the pots before starting the drought treatment to ensure that none of the plants were  
157 water limited. On 3 August 2020, we inoculated each pot in five of the ten cages (i.e. 90 pots)  
158 with 50 ml of potting soil that contained the soil-fauna communities we had collected. As a  
159 control for adding potting soil, we also added 50 ml of potting soil to each pot of the remaining  
160 five cages. We assigned the cages with and without soil-fauna inoculations to alternating  
161 positions that were at least 0.5 m apart from each other (Fig. S1). On 30 August 2020 (i.e. 27  
162 days after the start of the experiment), we started the drought treatment. One of the two pots of  
163 each alien target species in each cage served as a control, which was watered regularly to keep  
164 the substrate moist throughout the entire experiment, while the other pots did not receive water  
165 unless the plants had wilted. We daily checked all pots of the drought treatment, and when some  
166 plants of the community in a pot had wilted (i.e. had lost leaf turgor), we supplied the pot with 50  
167 ml of water. So, for each of the nine alien species, we had five replicates of each of the four  
168 drought × soil-fauna treatment combinations, resulting in a total of 180 pots (9 alien species × 2  
169 soil-fauna treatments [with vs without] × 2 drought treatments [well-watered vs drought] × 5



170 replicates [i.e. cages]).

171 On 28 September 2020, 10 weeks after the start of the drought treatments, we harvested the  
172 experiment. For each pot, we separately harvested the aboveground biomass of the alien target  
173 species and of each of the five native competitor species. As the roots of the plants were too  
174 much intertwined, we could not harvest the belowground biomass. All aboveground biomass was  
175 dried for at least 72 h at 65 °C, and then weighed. Based on the aboveground biomass of the  
176 alien and native species, we calculated the biomass proportion of the alien target species (the  
177 biomass of the alien target species / [biomass of the alien target species + biomass of the five  
178 native competitor species]) as a proxy of the dominance of the alien target species (for a similar  
179 approach, see Parepa et al. 2013 and Liu et al. 2018). We also calculated the aboveground  
180 biomass of the native community by summing the biomass of the five native species.

### 181 *Statistical analysis*

182 To analyze the effects of drought, soil-fauna addition and their interactions on performance  
183 of the alien plants in the native community, we fitted linear mixed-effects models using the lme  
184 function of the ‘nlme’ package (Pinheiro et al. 2020) in R 4.0.3 (R Core Team 2020).  
185 Aboveground biomass production of the alien target species, the native competitor species and  
186 biomass proportion of the alien target species in each pot (i.e. target aboveground biomass/total  
187 aboveground biomass) were the response variables. To meet the assumption of normality,  
188 biomass production of the alien target species and the native competitor species were  
189 natural-log-transformed, and biomass proportion of the target species was logit-transformed. We  
190 included drought treatment (i.e. well-watered vs drought), soil-fauna treatment (i.e. with vs  
191 without addition) and their interactions as fixed effects in all models.

192 To account for non-independence of individuals of the same alien plant species and for

193 phylogenetic non-independence of the species, we included identity of the target species nested  
194 within family as random factors in all models. In addition to account for non-independence of  
195 plants within the same cage, we also included cage identity as random factor in all model. As the  
196 homoscedasticity assumption was violated in all models, we also included variance structures to  
197 model different variances per species or per cage (based on model selection) using the “*varIdent*”  
198 function in the R package ‘nlme’ (Pinheiro et al. 2020). We used log-likelihood ratio tests to  
199 assess significance of the fixed effects drought treatment, soil-fauna treatment and their  
200 interaction (Zuur et al. 2009). These tests were based on comparisons of maximum-likelihood  
201 models with and without the terms of interest, and the variance components were estimated using  
202 the restricted maximum-likelihood method of the full model (Zuur et al. 2009).

## 203 **RESULTS**

204 Averaged across the nine alien target species, drought significantly decreased the  
205 aboveground biomass production of alien target species (-58.6%; Table 1; Figure 1a), and the  
206 native community (-51.5%; Table 1, Figure 1b). As the biomass of the aliens decreased more  
207 strongly in response to drought than the biomass of the natives did, the biomass proportion of the  
208 alien target species in each pot decreased (-11.6%; Table 1; Figure 1c). Inoculation with soil  
209 fauna had no significant effect on aboveground biomass of the alien target plants (-30.8%), but  
210 had a significant positive effect on aboveground biomass of the native community (+40.1%;  
211 Table 1; Figure 1b). Consequently, the aboveground biomass proportion of the alien target  
212 species was decrease in the presence of soil fauna (-41.9%; Table 1; Figure 1c). Moreover, as the  
213 native community benefitted more from the presence of soil fauna under well-watered conditions  
214 (+44.0%) than under drought conditions (+32.5%; Table 1; Figure 1b), the negative effect of  
215 soil-fauna inoculation on biomass proportion of the alien target species tended to be stronger  
216 under well-watered conditions (-49.7%) than under drought conditions (-32.0%; marginally  
217 significant  $S \times D$  interaction in Table 1,  $p = 0.09$ ; Figure 1c).

## 218 **DISCUSSION**

219 Our multispecies experiment found that drought limited the absolute and the relative  
220 biomass production of the alien target plants. This means that drought suppressed the invasion  
221 succession of the alien species in the native community. In addition, we found that the presence  
222 of soil-fauna communities benefited the native community and resulted in a decreased biomass  
223 proportion of the alien species. In other words, the soil fauna promoted the resistance of the  
224 native community against invasion by the alien species. Moreover, the suppressive effect of  
225 drought on biomass proportion of the alien plants disappeared (although this effect was only  
226 marginally significant;  $p = 0.09$ ) in the presence of soil fauna. This suggests that the presence of  
227 soil-fauna communities might mediate the negative effect of drought on alien plant invasion into  
228 a resident community.

229 While drought is well known to inhibit plant performance overall (Beierkuhnlein et al. 2011,  
230 Zlatev and Lidon 2012, Gupta et al. 2020), recent studies found that growth and reproduction  
231 were more strongly affected for invasive than for native plant species (Liu et al. 2017; Valliere et  
232 al. 2019; Kelso et al. 2020). Our results are consistent with these previous findings (see also the  
233 total biomass production per pot in Fig. S2), and suggest that the native competitors were more  
234 tolerant to drought than the invasive alien species (Werner et al. 2010; Copeland et al. 2016; Liu  
235 et al. 2017; LaForgia et al. 2018; Valliere et al. 2019; Kelso et al. 2020). On the other hand, it  
236 could also indicate that the invasive alien plants took more advantage of the well-watered  
237 conditions than the native species did. This would be in line with the idea that invasive plants  
238 show higher phenotypic plasticity, and capitalize more strongly on benign conditions than native  
239 plants do (i.e. the Master-of-some strategy *sensu* Richards et al. 2006). In any case, the negative  
240 effect of drought on the biomass proportion of the alien plants suggests that the competitive

241 balance between invasive alien plants and native plants could be changed by drought in favour of  
242 the resident community. Another recent study, however, showed that alien species that are not  
243 invasive yet could benefit from drought (Haeuser et al. 2019), which could imply a turn-over in  
244 invasive alien species with ongoing climate change.

245 Inoculation with soil fauna significantly increased the biomass production of the native  
246 community. It is often suggested that soil fauna, such as collembolans and mites in present study  
247 (Table S2), could enhance soil nutrient mineralization and consequently nutrient absorption of  
248 plants (Bardgett and Chan 1999, Lussenhop and Bassirrad 2005). As a consequence, soil fauna  
249 frequently have positive effects on plant performance (Lussenhop and Bassirrad 2005, Partsch et  
250 al. 2006, Mehring and Levin 2015). However, we found that soil-fauna inoculation had a slightly  
251 negative, though not statistically significant, effect on growth of the alien target plants. Therefore,  
252 it is unlikely that soil fauna promoted native plant growth solely by increasing nutrient  
253 availability, as we would have expected the invasive alien species to benefit from it. The most  
254 likely explanation for this is that although the invasive alien species may have been released  
255 from their native specialist enemies (Blossey and Notzold 1995; Chun et al. 2010), they may – in  
256 contrast to the native plant species – be largely naïve to the generalist herbivorous soil fauna in  
257 their new ranges (Parker et al. 2006; Verhoeven et al. 2009). As a result, a possible advantage due  
258 to an increase in soil-nutrient availability by the soil fauna might have been negated by negative  
259 effects of herbivorous soil fauna. As this would be less the case for the native species, this could  
260 explain why the soil fauna suppressed the dominance (i.e. biomass proportion) of alien target  
261 plants. While it has been shown before that soil fauna affects the composition of plant  
262 communities (Wardle et al. 2004; Bonkowski et al. 2009; Eisenhauer et al. 2010), this is one of  
263 the first studies to document the ability of the soil fauna to provide resistance against alien plant

264 invasion.

265       Although numerous studies have shown that climate change could affect interactions of  
266 plants with aboveground organisms at other trophic levels (de Sassi and Tylianakis 2012;  
267 Eisenhauer et al. 2012; Nooten and Hughes 2014; Meza-Lopez and Siemann 2020), only few  
268 studies have addressed how climate change may affect interactions of plants with belowground  
269 organisms at other trophic levels (Eisenhauer et al. 2012; Classen et al. 2015; Guyer et al. 2018;  
270 Wilschut and van Kleunen 2021). To the best of our knowledge, no studies have addressed how  
271 resident soil fauna might affect the interactions between native and invasive plant species. We  
272 found that the growth promotion of native plants induced by soil fauna was stronger under  
273 well-watered condition than under drought condition. This may be because drought could  
274 decrease the abundance and diversity of soil arthropods (Lindberg 2003; Kardol et al. 2010;  
275 Makkonen et al. 2011; Eisenhauer et al. 2012; Guyer et al. 2018; Aupic-Samain et al. 2020), and  
276 thus the increase of soil-nutrient availability induced by soil fauna is stronger under well-watered  
277 condition than under drought conditions. Interestingly, we found tentative evidence that the  
278 decrease in dominance of alien target plant caused by drought was larger in the absence of soil  
279 fauna than in its presence. In other words, the presence of soil fauna might buffer against the  
280 negative effects of drought on alien plant invasion in resident communities. Therefore, previous  
281 pot experiments that did not include soil fauna might have overestimated the effects of drought  
282 on alien plant invasion. Therefore, future studies testing effects of climate change on alien plant  
283 invasion should also consider the role of other trophic levels, and especially the role of  
284 belowground trophic levels.

## 285 **CONCLUSIONS**

286       The findings of our multi-species experiment are in line with results of previous studies that  
287 drought can inhibit alien plant invasion into a native resident community. However, to the best of  
288 our knowledge, we here show for the first time that the presence of soil fauna might help the  
289 resident plant community to resist alien plant invasions. This soil-fauna mediated resistance,  
290 however, may be partly negated by drought. This implies that with ongoing climate change, and  
291 more frequent droughts, invasive plants might be more likely to overcome the resistance  
292 provided by soil fauna.

293 **ACKNOWLEDGEMENTS**

294 We thank Xue Zhang, Lichao Wang and Yanjun Li for their practical assistance. YL  
295 acknowledges funding from the Chinese Academy of Sciences (Y9B7041001).

296

297 **AUTHOR CONTRIBUTIONS**

298 YL conceived the idea and designed the experiment. HJ and LC performed the experiment. HJ  
299 and YL analyzed the data. HJ and YL wrote the first draft of the manuscript, with further inputs  
300 from MvK and LC.

301

302 **DATA ACCESSIBILITY**

303 Should the manuscript be accepted, the data supporting the results will be archived in Dryad and  
304 the data DOI will be included at the end of the article.

305



306 **REFERENCES**

- 307 Ahanger, M. A., N. Morad Talab, E. F. Abd-Allah, P. Ahmad, and R. Hajiboland. 2016. Plant  
308 growth under drought stress: significance of mineral nutrients. *Water Stress and Crop*  
309 *Plants: A Sustainable Approach* 2:649–668.
- 310 Aupic Samain, A., V. Baldy, N. Delcourt, P. H. Krogh, T. Gauquelin, C. Fernandez, and M.  
311 Santonja. 2020. Water availability rather than temperature control soil fauna community  
312 structure and prey-predator interactions. *Functional Ecology*.
- 313 Bardgett, R. D., W. D. Bowman, R. Kaufmann, and S. K. Schmidt. 2005. A temporal approach to  
314 linking aboveground and belowground ecology. *Trends in Ecology and Evolution*  
315 20:634–641.
- 316 Bardgett, R. D., and K. F. Chan. 1999. Experimental evidence that soil fauna enhance nutrient  
317 mineralization and plant nutrient uptake in montane grassland ecosystems. *Soil Biology*  
318 *and Biochemistry* 31:1007–1014.
- 319 Barot, S., A. Ugolini, and F. B. Brikci. 2007. Nutrient cycling efficiency explains the long-term  
320 effect of ecosystem engineers on primary production. *Functional Ecology* 21:1–10.
- 321 Bartz, R., and I. Kowarik. 2019. Assessing the environmental impacts of invasive alien plants: a  
322 review of assessment approaches. *NeoBiota* 43:69–99.
- 323 Beierkuhnlein, C., D. Thiel, A. Jentsch, E. Willner, and J. Kreyling. 2011. Ecotypes of European  
324 grass species respond differently to warming and extreme drought. *Journal of Ecology*  
325 99:703–713.
- 326 Blossey, B., and R. Notzold. 1995. Evolution of increased competitive ability in invasive  
327 nonindigenous plants: a hypothesis. *Journal of Ecology* 83:887–889.
- 328 Bonkowski, M., C. Villenave, and B. Griffiths. 2009. Rhizosphere fauna: the functional and

- 329 structural diversity of intimate interactions of soil fauna with plant roots. *Plant and Soil*  
330 321:213–233.
- 331 Bueno, A., K. Pritsch, and J. Simon. 2020. Responses of native and invasive woody seedlings to  
332 combined competition and drought are species-specific. *Tree Physiology* 41:343–357.
- 333 Chun, Y. J., M. van Kleunen, and W. Dawson. 2010. The role of enemy release, tolerance and  
334 resistance in plant invasions: linking damage to performance. *Ecology letters*  
335 13:937–946.
- 336 Classen, A. T., M. K. Sundqvist, J. A. Henning, G. S. Newman, J. A. M. Moore, M. A. Cregger,  
337 L. C. Moorhead, and C. M. Patterson. 2015. Direct and indirect effects of climate change  
338 on soil microbial and soil microbial-plant interactions: What lies ahead? *Ecosphere*  
339 6:130.
- 340 Cole, L., K. M. Dromph, V. Boaglio, and R. D. Bardgett. 2004. Effect of density and species  
341 richness of soil mesofauna on nutrient mineralisation and plant growth. *Biology and*  
342 *Fertility of Soils* 39:337–343.
- 343 Copeland, S. M., S. P. Harrison, A. M. Latimer, E. I. Damschen, A. M. Eskelinen, B.  
344 Fernandez-Goñi, M. J. Spasojevic, B. L. Anacker, and J. H. Thorne. 2016. Ecological  
345 effects of extreme drought on Californian herbaceous plant communities. *Ecological*  
346 *Monographs* 86:295–311.
- 347 da Silva, E. C., R. J. M. C. Nogueira, M. A. da Silva, and M. B. de Albuquerque. 2011. Drought  
348 stress and plant nutrition. *Plant stress* 5:32–41.
- 349 Dai, A. 2013. Increasing drought under global warming in observations and models. *Nature*  
350 *climate change* 3:52–58.
- 351 de Sassi, C., and J. M. Tylianakis. 2012. Climate change disproportionately increases herbivore

- 352 over plant or parasitoid biomass. *PLoS One* 7:e40557.
- 353 Diffenbaugh, N. S., D. L. Swain, and D. Touma. 2015. Anthropogenic warming has increased  
354 drought risk in California. *PNAS* 112:3931–3936.
- 355 Eisenhauer, N., S. Cesarz, R. Koller, K. Worm, and P. B. Reich. 2012. Global change  
356 belowground: impacts of elevated CO<sub>2</sub>, nitrogen, and summer drought on soil food webs  
357 and biodiversity. *Global Change Biology* 18:435–447.
- 358 Eisenhauer, N., A. C. W. Sabais, F. Schonert, and S. Scheu. 2010. Soil arthropods beneficially  
359 rather than detrimentally impact plant performance in experimental grassland systems of  
360 different diversity. *Soil Biology and Biochemistry* 42:1418–1424.
- 361 Eisenhauer, N., and S. Scheu. 2008. Earthworms as drivers of the competition between grasses  
362 and legumes. *Soil Biology and Biochemistry* 40:2650–2659.
- 363 Erb, M., T. G. Köllner, J. Degenhardt, C. Zwahlen, B. E. Hibbard, and T. C. J. Turlings. 2011.  
364 The role of abscisic acid and water stress in root herbivore-induced leaf resistance. *New  
365 Phytologist* 189:308–320.
- 366 Essl, F., B. Lenzner, S. Bacher, S. Bailey, C. Capinha, C. Daehler, S. Dullinger, P. Genovesi, C.  
367 Hui, P. E. Hulme, J. M. Jeschke, S. Katsanevakis, I. Kühn, B. Leung, A. Liebhold, C. Liu,  
368 H. J. MacIsaac, L. A. Meyerson, M. A. Nuñez, A. Pauchard, P. Pyšek, W. Rabitsch, D. M.  
369 Richardson, H. E. Roy, G. M. Ruiz, J. C. Russell, N. J. Sanders, D. F. Sax, R. Scalera, H.  
370 Seebens, M. Springborn, A. Turbelin, M. van Kleunen, B. von Holle, M. Winter, R. D.  
371 Zenni, B. J. Mattsson, and N. Roura-Pascual. 2020. Drivers of future alien species  
372 impacts: An expert-based assessment. *Global Change Biology* 26:4880–4893.
- 373 Franco, A. L. C., L. A. Gherardi, C. M. de Tomasel, W. S. Andriuzzi, K. E. Ankrom, E. M. Bach,  
374 P. Guan, O. E. Sala, and D. H. Wall. 2020. Root herbivory controls the effects of water

- 375 availability on the partitioning between above- and below-ground grass biomass.  
376 *Functional Ecology* 34:2403–2410.
- 377 Gupta, A., A. Rico-Medina, and A. I. Caño-Delgado. 2020. The physiology of plant responses to  
378 drought. *Science* 368:266–269.
- 379 Guyer, A., B. E. Hibbard, A. Holzkämper, M. Erb, and C. A. M. Robert. 2018. Influence of  
380 drought on plant performance through changes in belowground tritrophic interactions.  
381 *Ecology and Evolution* 8:6756–6765.
- 382 Haeuser, E., W. Dawson, and M. van Kleunen. 2019. Introduced garden plants are strong  
383 competitors of native and alien residents under simulated climate change. *Journal of*  
384 *Ecology* 107:1328–1342.
- 385 Hejda, M., P. Pyšek, and V. Jarošík. 2009. Impact of invasive plants on the species richness,  
386 diversity and composition of invaded communities. *Journal of Ecology* 97:393–403.
- 387 Kardol, P., M. A. Cregger, C. E. Company, and A. T. Classen. 2010. Soil ecosystem functioning  
388 under climate change: plant species and community effects. *Ecology* 91:767–781.
- 389 Keane, R. M., and M. J. Crawley. 2002. Exotic plant invasions and the enemy release hypothesis.  
390 *Trends in Ecology and Evolution* 17:164–170.
- 391 Kelso, M. A., R. D. Wigginton, and E. D. Grosholz. 2020. Nutrients mitigate the impacts of  
392 extreme drought on plant invasions. *Ecology* 101:e02980.
- 393 Korell, L., M. Schädler, R. Brandl, S. Schreiter, and H. Auge. 2019. Release from above- and  
394 belowground insect herbivory mediates invasion dynamics and impact of an exotic plant.  
395 *Plants* 8:544.
- 396 LaForgia, M. L., M. J. Spasojevic, E. J. Case, A. M. Latimer, and S. P. Harrison. 2018. Seed  
397 banks of native forbs, but not exotic grasses, increase during extreme drought. *Ecology*

- 398           99:896–903.
- 399   Lindberg, N. 2003. Soil fauna and global change, Niklas Lindberg, Uppsala, Sweden.
- 400   Linders, T. E. W., U. Schaffner, R. Eschen, A. Abebe, S. K. Choge, L. Nigatu, P. R. Mbaabu, H.
- 401           Shiferaw, and E. Allan. 2019. Direct and indirect effects of invasive species: biodiversity
- 402           loss is a major mechanism by which an invasive tree affects ecosystem functioning.
- 403           *Journal of Ecology* 107:2660–2672.
- 404   Liu, H., and P. Stiling. 2006. Testing the enemy release hypothesis: a review and meta-analysis.
- 405           *Biological Invasions* 8:1535–1545.
- 406   Liu, Y. J., M. Liu, X. L. Xu, Y. Q. Tian, Z. Zhang, and M. van Kleunen. 2018. The effects of
- 407           changes in water and nitrogen availability on alien plant invasion into a stand of a native
- 408           grassland species. *Oecologia* 188:441–450.
- 409   Liu, Y. J., A. M. O. Oduor, Z. Zhang, A. Manea, I. M. Tooth, M. R. Leishman, X. L. Xu, and M.
- 410           van Kleunen. 2017. Do invasive alien plants benefit more from global environmental
- 411           change than native plants? *Global Change Biology* 23:3363–3370.
- 412   Lussenhop, J., and H. Bassirrad. 2005. Collembola effects on plant mass and nitrogen
- 413           acquisition by ash seedlings (*Fraxinus pennsylvanica*). *Soil Biology and Biochemistry*
- 414           37:645–650.
- 415   Macfadyen, A. 1962. Soil Arthropod Sampling. Academic Press, Swansea, UK.
- 416   Makkonen, M., M. P. Berg, J. R. Van Hal, T. V. Callaghan, M. C. Press, and R. Aerts. 2011. Traits
- 417           explain the responses of a sub-arctic collembola community to climate manipulation. *Soil*
- 418           *Biology and Biochemistry* 43:377–384.
- 419   Manea, A., D. R. Sloane, and M. R. Leishman. 2016. Reductions in native grass biomass
- 420           associated with drought facilitates the invasion of an exotic grass into a model grassland

- 421 system. *Oecologia* 181:175–183.
- 422 Marinissen, J. C. Y., and P. C. de Ruiter. 1993. Contribution of earthworms to carbon and  
423 nitrogen cycling in agro-ecosystems. *Agriculture, Ecosystems and Environment*  
424 47:59–74.
- 425 Mehring, A. S., and L. A. Levin. 2015. Potential roles of soil fauna in improving the efficiency of  
426 rain gardens used as natural stormwater treatment systems. *Journal of Applied Ecology*  
427 52:1445–1454.
- 428 Meza-Lopez, M. M., and E. Siemann. 2020. Warming alone increased exotic snail reproduction  
429 and together with eutrophication influenced snail growth in native wetlands but did not  
430 impact plants. *Science of The Total Environment* 704:135271.
- 431 Mitchell, C. E., and A. G. Power. 2003. Release of invasive plants from fungal and viral  
432 pathogens. *Nature* 421:625–627.
- 433 Nooten, S. S., and L. Hughes. 2014. Potential impacts of climate change on patterns of insect  
434 herbivory on understorey plant species: a transplant experiment. *Austral Ecology*  
435 39:668–676.
- 436 Ockendon, N., D. J. Baker, J. A. Carr, E. C. White, R. E. A. Almond, T. Amano, E. Bertram, R. B.  
437 Bradbury, C. Bradley, S. H. Butchart, N. Doswald, W. Foden, D. J. Gill, R. E. Green, W. J.  
438 Sutherland, E. V. Tanner, and J. W. Pearce-Higgins. 2014. Mechanisms underpinning  
439 climatic impacts on natural populations: altered species interactions are more important  
440 than direct effects. *Global Change Biology* 20:2221–2229.
- 441 Parepa, M., M. Fischer, and O. Bossdorf. 2013. Environmental variability promotes plant  
442 invasion. *Nature Communications* 4:1604.
- 443 Parker, J. D., D. E. Burkepile, and M. E. Hay. 2006. Opposing effects of native and exotic

- 444 herbivores on plant invasions. *Science* 311:1459–1461.
- 445 Partsch, S., A. Milcu, and S. Scheu. 2006. Decomposers (lumbricidae, collembola) affect plant  
446 performance in model grasslands of different diversity. *Ecology* 87:2548–2558.
- 447 Pinheiro, J., D. Bates, S. DebRoy, D. Sarkar, and R Core Team. 2020. nlme: linear and nonlinear  
448 mixed effects models. R package version 3.1–151.
- 449 Pintó-Marijuan, M., A. Cotado, E. Fleita-Soriano, and S. Munné-Bosch. 2017. Drought stress  
450 memory in the photosynthetic mechanisms of an invasive CAM species, *Aptenia*  
451 *cordifolia*. *Photosynthesis research* 131:241–253.
- 452 Pyšek, P., P. E. Hulme, D. Simberloff, S. Bacher, T. M. Blackburn, J. T. Carlton, W. Dawson, F.  
453 Essl, L. C. Foxcroft, P. Genovesi, J. M. Jeschke, I. Kuhn, A. M. Liebhold, N. E. Mandrak,  
454 L. A. Meyerson, A. Pauchard, J. Pergl, H. E. Roy, H. Seebens, M. van Kleunen, M. Vila,  
455 M. J. Wingfield, and D. M. Richardson. 2020. Scientists' warning on invasive alien  
456 species. *Biological Reviews* 95:1511–1534.
- 457 Pyšek, P., V. Jarošík, P. E. Hulme, J. Pergl, M. Hejda, U. Schaffner, and M. Vilà. 2012. A global  
458 assessment of invasive plant impacts on resident species, communities and ecosystems:  
459 the interaction of impact measures, invading species' traits and environment. *Global*  
460 *Change Biology* 18:1725–1737.
- 461 R Core Team (2020). R: A language and environment for statistical computing. Available at:  
462 <http://www.r-project.org/index.html>.
- 463 Richards, C. L., O. Bossdorf, N. Z. Muth, J. Gurevitch, and M. Pigliucci. 2006. Jack of all trades,  
464 master of some? On the role of phenotypic plasticity in plant invasions. *Ecology letters*  
465 9:981–993.
- 466 Seebens, H., S. Bacher, T. M. Blackburn, C. Capinha, W. Dawson, S. Dullinger, P. Genovesi, P. E.

- 467 Hulme, M. van Kleunen, I. Kuhn, J. M. Jeschke, B. Lenzner, A. M. Liebhold, Z. Pattison,  
468 J. Pergl, P. Pysek, M. Winter, and F. Essl. 2020. Projecting the continental accumulation  
469 of alien species through to 2050. *Global Change Biology* 00:1–13.
- 470 Seebens, H., T. M. Blackburn, E. E. Dyer, P. Genovesi, P. E. Hulme, J. M. Jeschke, S. Pagadl, P.  
471 Pyšek, M. van Kleunen, M. Winter, M. Ansong, M. Arianoutsos, S. Bachert, B.  
472 Blasius, E. G. Brockerhoff, G. Brundu, C. Capinha, C. E. Causton, L. Celesti-Grapowa,  
473 W. Dawson, S. Dullinger, E. Economo, E. P. N. Fuentes, B. Guénard, H. Jäger, J. Kartesz,  
474 M. Kenis, I. Kühn, B. Lenzner, A. M. Liebhold, A. Mosena, D. Moser, W. Nentwig, M.  
475 Nishino, D. Pearman, J. Pergl, W. Rabitsch, J. Rojas-Sandoval, A. Roques, S. Rorke, S.  
476 Rossinelli, H. E. Roy, R. Scalera, S. Schindler, K. Štajerová, B. Tokarska-Guzik, K.  
477 Walker, D. F. Ward, T. Yamanaka, and F. Essl. 2018. Global rise in emerging alien species  
478 results from increased accessibility of new source pools. *PNAS* 115:2264–2273.
- 479 Smith, V. R., and M. Steenkamp. 1992. Soil macrofauna and nitrogen on a sub-Antarctic island.  
480 *Oecologia* 92:201–206.
- 481 Spinoni, J., J. V. Vogt, G. Naumann, P. Barbosa, and A. Dosio. 2018. Will drought events become  
482 more frequent and severe in Europe? *International Journal of Climatology* 38:1718–1736.
- 483 Valliere, J. M., E. B. Escobedo, G. M. Bucciarelli, M. R. Sharifi, and P. W. Rundel. 2019.  
484 Invasive annuals respond more negatively to drought than native species. *New*  
485 *Phytologist* 223:1647–1656.
- 486 van Kleunen, M., W. Dawson, F. Essl, J. Pergl, M. Winter, E. Weber, H. Kreft, P. Weigelt, J.  
487 Kartesz, M. Nishino, L. A. Antonova, J. F. Barcelona, F. J. Cabezas, D. Cardenas, J.  
488 Cardenas-Toro, N. Castano, E. Chacon, C. Chatelain, A. L. Ebel, E. Figueiredo, N.  
489 Fuentes, Q. J. Groom, L. Henderson, Inderjit, A. Kupriyanov, S. Masciadri, J. Meerman,



490 O. Morozova, D. Moser, D. L. Nickrent, A. Patzelt, P. B. Pelsler, M. P. Baptiste, M.  
491 Poopath, M. Schulze, H. Seebens, W. S. Shu, J. Thomas, M. Velayos, J. J. Wieringa, and P.  
492 Pysek. 2015. Global exchange and accumulation of non-native plants. *Nature*  
493 525:100–103.

494 van Kleunen, M., F. Essl, J. Pergl, G. Brundu, M. Carboni, S. Dullinger, R. Early, P.  
495 Gonzalez-Moreno, Q. J. Groom, P. E. Hulme, C. Kuešer, I. Kuehn, C. Magua, N. Maurel,  
496 A. Novoa, M. Parepa, P. Pysek, H. Seebens, R. Tanner, J. Touza, L. Verbrugge, E. Weber,  
497 W. Dawson, H. Kreft, P. Weigelt, M. Winter, G. Klonner, M. V. Talluto, and K.  
498 Dehnen-Schmutz. 2018. The changing role of ornamental horticulture in alien plant  
499 invasions. *Biological Reviews* 93:1421–1437.

500 Verhoeven, K. J. F., A. Biere, J. A. Harvey, and W. H. van der Putten. 2009. Plant invaders and  
501 their novel natural enemies: who is naïve? *Ecology letters* 12:107–117.

502 Vilà, M., J. L. Espinar, M. Hejda, P. E. Hulme, V. Jarošík, J. L. Maron, J. Pergl, U. Schaffner, Y.  
503 Sun, and P. Pyšek. 2011. Ecological impacts of invasive alien plants: a meta-analysis of  
504 their effects on species, communities and ecosystems. *Ecology letters* 14:702–708.

505 Vilà, M., J. L. Maron, and L. Marco. 2005. Evidence for the enemy release hypothesis in  
506 *Hypericum perforatum*. *Oecologia* 142:474–479.

507 Wardle, D. A., R. D. Bardgett, J. N. Klironomos, H. Setälä, W. H. van der Putten, and D. H. Wall.  
508 2004. Ecological linkages between aboveground and belowground biota. *Science*  
509 304:1629–1633.

510 Werner, C., U. Zunkier, W. Beyschlag, and C. Máguas. 2010. High competitiveness of a  
511 resource demanding invasive acacia under low resource supply. *Plant Ecology*  
512 206:83–96.

- 513 Wilschut, R. A., and S. Geisen. 2021. Nematodes as drivers of plant performance in natural  
514 systems. *Trends in Plant Science* 26:237–247.
- 515 Wilschut, R. A., and M. van Kleunen. 2021. Drought alters plant–soil feedback effects on  
516 biomass allocation but not on plant performance. *Plant and Soil* 462:285–296.
- 517 Xu, G. L., J. G. Mo, G. Y. Zhou, and S. L. Peng. 2003. Relationship of soil fauna and N cycling  
518 and its response to N deposition. *Acta Ecologica Sinica* 23:2453–2463.
- 519 Yan, X. L., Z. H. Wang, and J. S. Ma. 2019. The checklist of the naturalized plants in china.  
520 Shanghai Scientific and Technical Publishers, Shanghai, China.
- 521 Yoon, J. H., S. Y. S. Wang, R. R. Gillies, B. Kravitz, L. Hipps, and P. J. Rasch. 2015. Increasing  
522 water cycle extremes in California and in relation to ENSO cycle under global warming.  
523 *Nature Communications* 6:8657.
- 524 Zlatev, Z., and F. C. Lidon. 2012. An overview on drought induced changes in plant growth,  
525 water relations and photosynthesis. *Emirates Journal of Food and Agriculture* 24:57–72.
- 526 Zuur, A. F., E. N. Ieno, N. J. Walker, A. A. Saveliev, and G. M. Smith. 2009. Mixed effects  
527 models and extensions in ecology with R. Springer, New York, USA.

528 **Table 1**

529 Table 1 Results of linear mixed-effects models testing the effects of drought (well-watered vs drought), soil fauna (with vs without) and their  
 530 interactions on aboveground biomass production of the alien target plants, native competitor species, and biomass proportion of the alien target  
 531 species in each pot. Significant effects ( $p < 0.05$ ) are bold.

| Fixed effects                      | Aboveground biomass production of the alien target species (natural-log-transformed) |                                  |                                     | Aboveground biomass production of the native competitor species (natural-log-transformed) |                                  |                                     | Aboveground biomass proportion of the target species in each pot (logit-transformed) |                                  |                                     |
|------------------------------------|--------------------------------------------------------------------------------------|----------------------------------|-------------------------------------|-------------------------------------------------------------------------------------------|----------------------------------|-------------------------------------|--------------------------------------------------------------------------------------|----------------------------------|-------------------------------------|
|                                    | Df                                                                                   | $\chi^2$                         | <i>P</i>                            | Df                                                                                        | $\chi^2$                         | <i>P</i>                            | Df                                                                                   | $\chi^2$                         | <i>P</i>                            |
| Soil fauna (S)                     | 1                                                                                    | 2.4990                           | 0.1139                              | 1                                                                                         | 4.7722                           | <b>0.0289</b>                       | 1                                                                                    | 7.0803                           | <b>0.0078</b>                       |
| Drought (D)                        | 1                                                                                    | 63.8413                          | <b>&lt;0.0001</b>                   | 1                                                                                         | 164.1043                         | <b>&lt;0.0001</b>                   | 1                                                                                    | 5.6339                           | <b>0.0176</b>                       |
| S × D                              | 1                                                                                    | 0.1512                           | 0.6974                              | 1                                                                                         | 5.6304                           | <b>0.0177</b>                       | 1                                                                                    | 2.8297                           | <u>0.0925</u>                       |
| <b>Random effects</b>              |                                                                                      | <i>SD</i>                        |                                     |                                                                                           | <i>SD</i>                        |                                     |                                                                                      | <i>SD</i>                        |                                     |
| Family                             |                                                                                      | 0.004                            |                                     |                                                                                           | 0.002                            |                                     |                                                                                      | 0.004                            |                                     |
| Species                            |                                                                                      | 0.970*                           |                                     |                                                                                           | 0.086                            |                                     |                                                                                      | 1.057*                           |                                     |
| Cage                               |                                                                                      | 0.004                            |                                     |                                                                                           | 0.267*                           |                                     |                                                                                      | 0.187                            |                                     |
| Residual                           |                                                                                      | 0.586                            |                                     |                                                                                           | 0.126                            |                                     |                                                                                      | 0.555                            |                                     |
|                                    |                                                                                      | <b>Marginal <math>R^2</math></b> | <b>Conditional <math>R^2</math></b> |                                                                                           | <b>Marginal <math>R^2</math></b> | <b>Conditional <math>R^2</math></b> |                                                                                      | <b>Marginal <math>R^2</math></b> | <b>Conditional <math>R^2</math></b> |
| <i>R</i> <sup>2</sup> of the model |                                                                                      | 0.138                            | 0.770                               |                                                                                           | 0.641                            | 0.940                               |                                                                                      | 0.063                            | 0.802                               |

532 \* Standard deviations for individual alien species or individual cage random effects for the saturated model are found in Table S3.

533 **Figure 1**

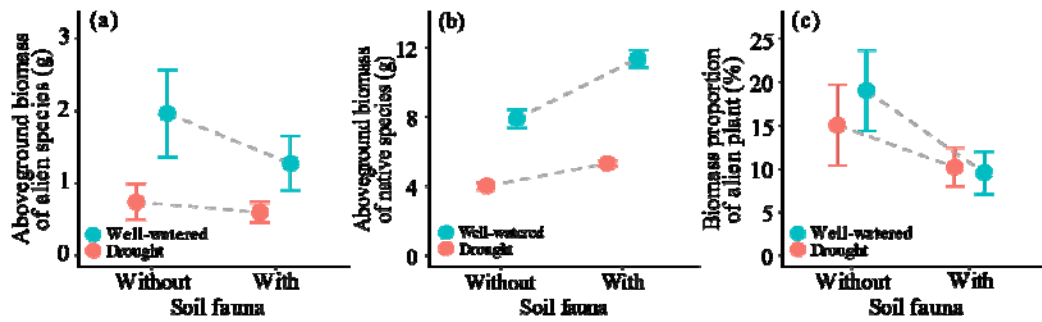

534

535 Figure 1 Mean values ( $\pm$  SE) of aboveground biomass of the alien target species (a),  
536 aboveground biomass production of the native competitor species (b), and biomass  
537 proportion of the alien target species in each pot (c) under different drought (well-watered vs  
538 drought) and soil-fauna (with vs without) treatments.

539 **SUPPORTING INFORMATION**540 **Table S1** Details of the study species used in the experiment.

| <b>Species</b>                              | <b>Family</b>  | <b>Status</b> | <b>Seed sources</b>                   | <b>Sowing data</b> |
|---------------------------------------------|----------------|---------------|---------------------------------------|--------------------|
| <i>Bidens frondosa</i> L.                   | Asteraceae     | Alien         | Zhejiang, China                       | 26/6/2020          |
| <i>Bidens pilosa</i> L.                     | Asteraceae     | Alien         | Zhejiang, China                       | 26/6/2020          |
| <i>Erigeron canadensis</i> L.               | Asteraceae     | Alien         | Jilin, China                          | 26/6/2020          |
| <i>Hibiscus trionum</i> L.                  | Malvaceae      | Alien         | Jilin, China                          | 5/7/2020           |
| <i>Lolium perenne</i> L.                    | Poaceae        | Alien         | Greenwood flower seed industry, China | 26/6/2020          |
| <i>Medicago sativa</i> L.                   | Leguminosae    | Alien         | Nei Mongol, China                     | 26/6/2020          |
| <i>Paspalum notatum</i> Flügge              | Poaceae        | Alien         | Zhejiang, China                       | 15/5/2020          |
| <i>Solidago canadensis</i> L.               | Asteraceae     | Alien         | Zhejiang, China                       | 26/6/2020          |
| <i>Xanthium strumarium</i> L.               | Asteraceae     | Alien         | Nei Mongol, China                     | 26/6/2020          |
| <i>Chloris virgata</i> Sw.                  | Poaceae        | Native        | Nei Mongol, China                     | 26/6/2020          |
| <i>Digitaria sanguinalis</i> (L.) Scop.     | Poaceae        | Native        | Jilin, China                          | 26/6/2020          |
| <i>Echinochloa crus-galli</i> (L.) P.Beauv. | Poaceae        | Native        | Jilin, China                          | 26/6/2020          |
| <i>Lepidium apetalum</i> Willd.             | Brassicaceae   | Native        | Jilin, China                          | 26/6/2020          |
| <i>Plantago asiatica</i> L.                 | Plantaginaceae | Native        | Nei Mongol, China                     | 26/6/2020          |

541 **Table S2** Soil-fauna taxa found in the soil used to inoculate the pot mesocosms.

| <b>Species</b>                                        | <b>Taxonomy groups</b> |
|-------------------------------------------------------|------------------------|
| <i>Allonychiurus songi</i>                            | Collembola             |
| <i>Entomobrya koreana</i>                             | Collembola             |
| <i>Folsomia sp1</i>                                   | Collembola             |
| <i>Folsomides sp1</i>                                 | Collembola             |
| <i>Homidia phjongiangica</i>                          | Collembola             |
| <i>Hypogastrura sp1</i>                               | Collembola             |
| <i>Isotomiella minor</i>                              | Collembola             |
| <i>Isotomodes sp1</i>                                 | Collembola             |
| <i>Orchesellides sinensis</i>                         | Collembola             |
| <i>Proisotoma sp1</i>                                 | Collembola             |
| <i>Sminthurides sp1</i>                               | Collembola             |
| <i>Thalassaphorura macrospinta</i>                    | Collembola             |
| <i>Acrotritia ardua</i> (Koch, 1841)                  | Mites                  |
| <i>Antennoseius alexandrovi</i> Bregetova, 1977       | Mites                  |
| <i>Galumna changchunensis</i> Wen, 1987               | Mites                  |
| <i>Mesostigamata sp.1</i>                             | Mites                  |
| <i>Mesostigamata sp.2</i>                             | Mites                  |
| <i>Mesostigamata sp.3</i>                             | Mites                  |
| <i>Mesostigamata sp.4</i>                             | Mites                  |
| <i>Mesostigamata sp.5</i>                             | Mites                  |
| <i>Mesostigamata sp.6</i>                             | Mites                  |
| <i>Mesostigamata sp.7</i>                             | Mites                  |
| <i>mites nymph</i>                                    | Mites                  |
| <i>Nothrus anauniensis</i> Canestrini & Fanzago, 1877 | Mites                  |
| <i>Oppiella nova</i> (Oudemans, 1902)                 | Mites                  |
| <i>Prostigamata sp.1</i>                              | Mites                  |
| <i>Prostigamata sp.2</i>                              | Mites                  |
| <i>Scheloribates fimbriatus</i> Thor, 1930            | Mites                  |
| <i>Tectocepheus velatus</i> (Michael, 1880)           | Mites                  |
| <i>Trichogalumna nipponica</i> (Aoki, 1966)           | Mites                  |
| <i>Veigaia slonovi</i> Bregetova, 1961                | Mites                  |
| <i>Zygoribatula exilis</i> (Nicolet, 1855)            | Mites                  |
| <i>Zygoribatula truncata</i> (Aoki, 1961)             | Mites                  |
| <i>Araneae</i>                                        | Others                 |
| <i>Chilopoda</i>                                      | Others                 |
| <i>Coleoptera adult</i>                               | Others                 |
| <i>Coleoptera larvae</i>                              | Others                 |
| <i>Diptera larvae</i>                                 | Others                 |
| <i>Formicidae</i>                                     | Others                 |
| <i>Homoptera larvae</i>                               | Others                 |
| <i>Phytophthora</i>                                   | Others                 |
| <i>Protura</i>                                        | Others                 |
| <i>Scutigerebellidae</i>                              | Others                 |

542

543 **Table S3** Standard deviations for individual alien species or individual cage random effects for metrics analyzed with models with a Gaussian  
 544 error distribution. The standard deviations given refer to the first species and cage respectively. For each species and cage, these should be  
 545 multiplied by the multiplication factors. The names of the alien species in the table are abbreviated using the first letter of the genus and species  
 546 epithet.

547

| Metric                                                           | Species Standard Deviation | Multiplication factor standard deviation |       |       |       |       |       |       |       |       |  |
|------------------------------------------------------------------|----------------------------|------------------------------------------|-------|-------|-------|-------|-------|-------|-------|-------|--|
|                                                                  |                            | LP                                       | EC    | HT    | PN    | SC    | BF    | BP    | MS    | XS    |  |
| Aboveground biomass production of the alien target species       | 0.970                      | 1.000                                    | 0.778 | 0.626 | 0.820 | 1.078 | 1.935 | 2.600 | 1.890 | 1.778 |  |
| Aboveground biomass proportion of the target species in each pot | 1.057                      | 1.000                                    | 0.879 | 0.920 | 0.942 | 1.179 | 2.164 | 2.958 | 1.905 | 1.815 |  |

548

549

| Metric                                                          | Cages Standard Deviation | Multiplication factor for standard deviation |       |       |       |       |       |       |       |       |        |
|-----------------------------------------------------------------|--------------------------|----------------------------------------------|-------|-------|-------|-------|-------|-------|-------|-------|--------|
|                                                                 |                          | Cage1                                        | Cage2 | Cage3 | Cage4 | Cage5 | Cage6 | Cage7 | Cage8 | Cage9 | Cage10 |
| Aboveground biomass production of the native competitor species | 0.267                    | 1.000                                        | 2.461 | 2.603 | 3.751 | 1.531 | 1.725 | 2.090 | 1.302 | 3.503 | 2.590  |

550 **Figure S1**

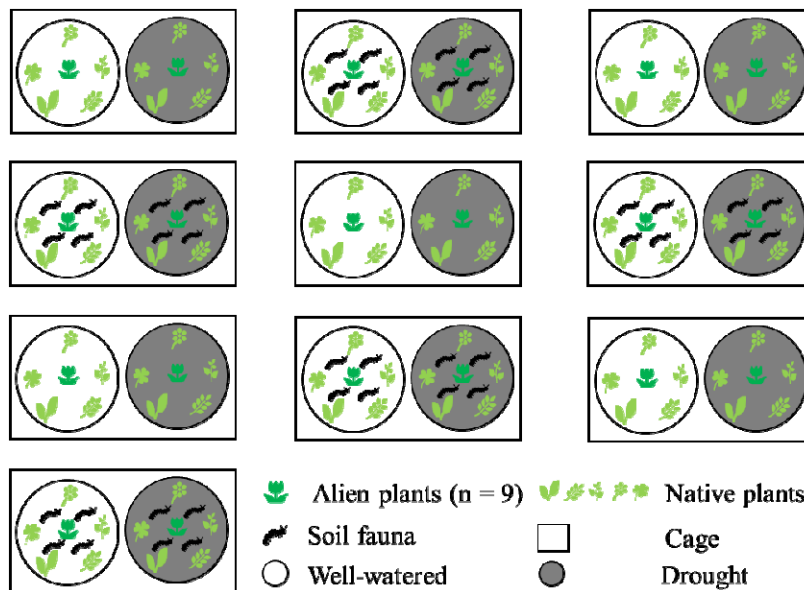



553 **Figure S2**

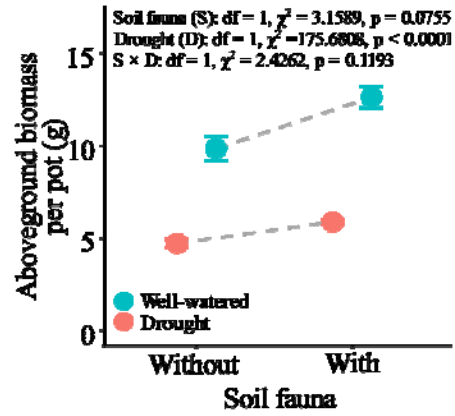

554

555 Figure S2 Mean values ( $\pm$  SE) of the aboveground biomass production per pot under different

556 drought (well-watered vs drought) and soil fauna (with vs without) treatment.
